1 **Full title: Assessing the knowledge, attitudes, practices, and perspectives of stakeholders of**  
2 **the deworming program in rural Rwanda**

3 **Short title: Knowledge, attitudes, practices, and perspectives on deworming**

4

5 **Authors and affiliations:**

6 Fernand Rwamwejo<sup>1</sup>, Grace Iliza Ndatinya<sup>2</sup>, Madalitso Ireen Mkata<sup>3</sup>, Amy Blauman<sup>4</sup>, Denis

7 Regnier<sup>5</sup>, Sarah Cruz<sup>6</sup>

8

9 <sup>1</sup> Director General's office, Rwanda Biomedical Center, Kigali, Rwanda.

10 <sup>2</sup> Department of Community Health and Social Medicine, University of Global Equity, Kigali,  
11 Rwanda.

12 <sup>3</sup> Director of Programs, Developed Medical Imaging, Blantyre, Malawi.

13 <sup>4</sup> Programme unit, World Food Programme, Kigali, Rwanda.

14 <sup>5</sup> Department of Humanities and Social Sciences, University of Global Health Equity, Kigali,  
15 Rwanda.

16 <sup>6</sup> M&E unit, World Food Programme, Kigali, Rwanda

17 **ABSTRACT**

18 **Background:** Worm infections are among the most prevalent neglected tropical diseases  
19 worldwide. Schistosomiasis and soil-transmitted helminths infections, most common worm  
20 infections affecting Rwandan school-aged children, are addressed by the national deworming  
21 program since 2014. To date, no published studies have assessed the knowledge, attitudes, and  
22 practices of the key implementers of the national deworming program conducted at village and  
23 school level. This study aimed to assess key stakeholders' knowledge, attitudes, practices, and  
24 perspectives about the decentralized national deworming program.

25 **Methods/ Principal Findings:** We carried out a quantitative, cross-sectional study with  
26 complementary in-depth interviews in two districts of Rwanda in June 2021. From the 852  
27 surveyed community health workers and teachers, 54.1% had a knowledge score considered good  
28 ( $\geq 80\%$ ). The mean knowledge score was 78.04%. From the multivariate analysis, lack of training  
29 was shown to increase the odds of having poor knowledge (OR 0.487, 95% CI: 0.328 – 0.722,  $p$   
30  $< 0.001$ ). The in-depths interviews revealed poor water access and hesitance from caregivers as  
31 perceived challenges to the success of the deworming program.

32 **Conclusion:** Our findings demonstrate the importance of training community health workers and  
33 schoolteachers on worm infections as they are the key implementers of the deworming program.  
34 This would enhance their capacity to provide health education and sensitization on misconceptions  
35 and misinformation towards deworming. Moreover, research is needed to assess the impact of poor  
36 access to water, sanitation and hygiene facilities on the prevalence of worm infections in Rwanda.

## 37 **AUTHOR SUMMARY**

38 Worm infections affect over 2 billion people worldwide, and the most common are schistosomiasis  
39 and soil-transmitted helminth infections. In Rwanda, the prevalence of soil-transmitted helminth  
40 infections can be as high as 45%, while the prevalence of schistosomiasis is 2.7% among school-  
41 aged children.

42 The government of Rwanda continues to develop initiatives to eradicate worm infection, among  
43 which, the national decentralized deworming program, implemented at village and school level.

44 In this program, community health workers collaborate with teachers and local leaders to  
45 administer deworming tablets, community sensitization and health education. To date, no  
46 published studies have been conducted to understand the experiences and perspectives of key  
47 stakeholders in the national deworming program in Rwanda. We conducted a quantitative analysis  
48 of the Knowledge, Attitudes and Practices (KAP) of teachers and community health workers, and  
49 a qualitative assessment of the perspectives of local leaders in two of the most food insecure  
50 districts of Rwanda. The results show a gap in the knowledge of community health workers and  
51 teachers on worm infections. The study also revealed that there were some misconceptions about  
52 deworming tablets, which highlights the need to train key implementers of the program for them  
53 to transfer their knowledge to the broader community.

## 54 INTRODUCTION

55 Worm infections affect more than 2 billion people worldwide, with soil-transmitted helminth  
56 infections (STH) and schistosomiasis being the two most common types [1]. In 2022, about 1.5  
57 billion people were affected by STH, and 200 million by Schistosomiasis [2, 3]. The infections  
58 disproportionately affect impoverished populations in low and middle income countries (LMIC)  
59 [4], with over 90% of Schistosomiasis cases being recorded in sub-Saharan Africa [2, 3].

60 STH and Schistosomiasis are transmitted through contaminated water or soil, either orally or  
61 through punctured skin [4, 5, 6]. Impoverished populations are at higher risk due to lack of  
62 adequate access to clean water, basic sanitation and hygiene facilities, and footwear [4, 7]. People  
63 living in rural communities where agriculture and fishing are commonly practiced are at high risk.  
64 The infections can affect people from all age groups, but children were found to be more affected  
65 by numerous long-term effects. Worm infections cause numerous intestinal symptoms and chronic  
66 illness, which frequently lead to decreased growth, and cognitive impairment resulting in long  
67 term diminished productivity [8, 9, 10, 11]

68 In Rwanda, Schistosomiasis and STH are the most common neglected tropical diseases [12].  
69 Occupational exposure through agriculture and water bodies is a common risk factor as 74% of  
70 households (primarily rural) are engaged in agriculture and live around Lake Kivu - the largest  
71 body of water in Rwanda. Moreover, with insufficient sewage water treatment, they are exposed  
72 to urban and household waste [13]. A nationwide study conducted in 2008 showed that 65.8% of  
73 school-aged children had STH, with a higher prevalence in rural districts compared to Kigali [14].  
74 A follow-up study conducted in 2014 showed a slight decrease in the prevalence, with an overall  
75 45% of school-aged children infected with [15]. The 2008 mapping revealed a 2.7% nationwide

76 prevalence of schistosomiasis [12] with a district level prevalence, ranging from 0 to 69.5% among  
77 school children.

78 Mass Deworming Administration (MDA) is the recommended intervention to reduce and manage  
79 STH and schistosomiasis in conjunct with programs increasing access to clean water, hygiene, and  
80 sanitation facilities [4]. In 2014, the Rwandan Ministry of Health, supported by WHO and the  
81 World Food Programme (WFP), adopted a nation-wide deworming program to address worm  
82 infections. WFP has been implementing the Home-Grown School Feeding program (HGSF) since  
83 2016 in four of Rwanda's most food insecure districts: Nyaruguru and Nyamagabe in the southern  
84 province, as well as Karongi and Rutsiro in the western province. This program includes a  
85 comprehensive package of complementary activities aiming to improve quality of education,  
86 academic performance, nutrition, and health. WFP directly supports deworming activities in  
87 schools as part of the biannual integrated national maternal and child health week campaign, led  
88 by the Rwanda Biomedical Center [16]. The national deworming programs, targeting children and  
89 communities, are conducted by community health workers (CHWs) and schoolteachers through  
90 outreach campaigns, with the local community leaders supervising the implementation.  
91 Understanding the knowledge, attitudes, and practices (KAP) of teachers and CHW and the  
92 perspectives of local leaders is necessary to ensure adequate training, support, and supervision of  
93 these key implementers [17]. To our knowledge, there is a dearth of studies assessing the KAP of  
94 teachers and CHWs, as well as the perceptions of local leaders about deworming in Rwanda. Our  
95 study addressed this gap and provided insights into the Rwandan national deworming program.

## 96    **METHODS**

### 97    **Study setting**

98    The investigation took place in Nyamagabe and Rutsiro districts, two of the four districts where  
99    the WFP's Home-Grown School Feeding (HGSF) program is implemented. In 2021, 330,000  
100    people resided in Nyamagabe, including 1,608 CHWs and 103 primary schools, 25 of which were  
101    implementing the HGSF program [[18,19](#)]. Rutsiro had a total population of 324,654 people  
102    including 1,449 CHWs; and 87 primary schools, 21 of which were implementing the HGSF  
103    program [[20, 21](#)].

### 104    **Study Design**

105    The study utilized both quantitative and qualitative study methods. A cross-sectional quantitative  
106    survey was used to assess the KAP of schoolteachers and CHWs about deworming, and in-depth  
107    interviews (IDIs) were used to collect the perspectives of local leaders about the deworming  
108    program implemented at village level, using a phenomenological design.

### 109    **Sample**

#### 110    Sample

##### 111        *Survey*

112

113        Teachers from schools and CHWs working in villages where the HGSF program were  
114        implemented in the study sites were included in the study. Those who did not participate  
115        in the deworming program were excluded.

116

117 *In-depth Interview*

118 Local leaders in the study sites who participated in the national deworming program were  
119 the target sample.

120 Sample size and sampling

121 *Survey*

122 Cluster sampling was used. The sample size was calculated using karimollah formula [22]  
123 and multiplied by the design effect to adjust for the design effect of the sample design. A  
124 sample size of 326 teachers was needed to achieve a 95% confidence level, 0.05 margin of  
125 error. There were 755 teachers in 46 schools where the HGSF program is implemented.  
126 Given that 52.3% (395) of teachers were in Nyamagabe and 47.7% (360) in Rutsiro, we  
127 randomly selected 13 schools from Nyamagabe district and 12 schools from Rutsiro  
128 district. All teachers who fulfilled the selection criteria in the selected schools were invited  
129 to participate in the survey.

130 
$$n = \left[ t^2 \times \frac{p \times q}{d^2} \right] \times DEFF$$

131

132 
$$n = \frac{n_0 N}{n_0 + (N-1)}$$

133 **Final N =  $\frac{\text{Number of participants needed}}{1 - NRR}$**

134 N: Total sample in 2 districts

135 t: linked to 95% confidence interval for cluster sampling=1.96

136 **p**: expected prevalence (fraction 1) = 0.5

137 **q**: 1-p (expected non-prevalence) = 0.5

138 **d**: relative desired precision =0.5

139 **DEFF**: Design Effect = 1.5

140 **n**: sample size

141 **NRR**: Non-response rate =5%

142 Using the same formula, a sample size of 484 CHWs was needed. There were 3057 CHWs  
143 in both districts. Given that 52.6% (1608) of CHWs were in Nyamagabe and 47.4% (1449)  
144 in Rutsiro, 15 cells from Nyamagabe district and 10 cells from Rutsiro district were  
145 randomly selected. All CHWs who fulfilled the selection criteria in the 25 selected cells  
146 were invited to participate in the survey.

147

148 *In-depth Interview*

149 Sample size was determined by theoretical saturation. Purposive sampling was used.

## 150 **Data collection procedures**

151 *Survey*

152 Approvals were obtained from school directors. Data collectors went to individual schools  
153 to administer the survey to the teachers.



154 CHWs were contacted through phone calls according to the contact information provided  
155 by health district coordinators. Data collectors met with the CHWs at their preferred  
156 locations according to the appointment to administer the survey.

157  
158 Informed consents were obtained after detailed explanation of the study was provided. The  
159 data collectors read the questions to individual participants in Kinyarwanda (the local  
160 language) and recorded the responses directly on Open Data Kit (ODK) through tablets.  
161 The survey took approximately 20 minutes to complete.

### 162 *In-depth Interview*

163 Local community leaders were contacted through the district health coordinators. They  
164 were first contacted through phone calls and data collectors met with them at the agreed  
165 appointment time and locations.

166 Informed consents and permission to record were obtained after detailed explanation of the  
167 study was provided. The interviews were conducted in a private office in Kinyarwanda;  
168 only the researcher and participant were in the room during the interview.

## 169 **Data collection tools**

### 170 *Survey*

171 A questionnaire (S1 appendix) was developed based on previous similar KAP studies [\[23\]](#).

172 The questionnaire had four parts. Part 1 collected some basic demographic information.  
173 Part 2 contained 16 “yes”, “no” or “I don’t know” knowledge questions, with nine related  
174 to schistosomiasis and seven related to STH. Part 3 contained ten 4-point Likert scale

175 statements, with five related to the respondents' attitude on Schistosomiasis and five on  
176 STH. The options for these statements were: "strongly agree", "agree", "disagree" and  
177 "strongly disagree". Part 4 contained six 4-point Likert scale statements related to their  
178 practices. The options for these statements were: "never", "rarely", "often" and "always".

### 179 *In-depth Interview*

180 A semi-structured interview guide (S2 appendix) was developed. Six main open-ended  
181 questions with probes were included to capture the experiences, challenges, best practices  
182 and recommendations of local leaders in the implementation of the national deworming  
183 program.

184 Both the survey and semi-structure interview guide were developed in English then translated to  
185 Kinyarwanda and back translated to English. Modifications were made based on the feedback from  
186 pre-testing before the final version was administered.

### 187 **Measures**

188 Four key measures were included in this study:

- 189 1. Knowledge level, subdivided into STH and Schistosomiasis
- 190 2. Attitude toward MDA program, subdivided into STH and Schistosomiasis
- 191 3. Practices on worm infection prevention
- 192 4. Perspectives about the deworming program

### 193 **Data management and analysis**

194 Descriptive analyses were conducted for demographic information and the KAP results. The  
195 knowledge score was calculated as the percentage of correct answers divided by questions

196 answered. The overall knowledge was categorized as “good” if the score was between 80 and  
197 100%, and poor if less than 80% [24]. The attitude statements were presented as the percentage  
198 of choosing “agree” and “strongly agree” versus the percentage of choosing “disagree” and  
199 “strongly disagree”. The practices statements were presented as the percentage of choosing  
200 “never” and “rarely” versus the percentage of choosing “often” and “always”.

201 Fisher’s exact test was used to analyze the association between knowledge level and  
202 demographics, between knowledge level and attitude category, and between knowledge level and  
203 practice category.

204 All demographic variables with  $P < 0.10$  in the bivariate analysis were then included in the logistic  
205 regression model for analyzing factors contributing to knowledge level, attitude and practices.

206 All the statistical tests were performed using SPSS v.27.0.1, with a p-value  $< 0.05$ .

207 The IDIs were transcribed and translated. The codebook was developed based on the interview  
208 responses inductively and iteratively by three investigators. All transcripts were coded based on  
209 the final codebook first individually then together as a team. Thematic analysis was used to identify  
210 emerging themes. Qualitative analyses were conducted using Dedoose software.

### 211 **Ethical Consideration**

212 This study was approved by the University of Global Health Equity institutional review board.

213 **RESULTS**

214 **Survey results**

215 **▪ Sample demographic characteristics**

216 A total of 852 people were surveyed, among which 509 (59.7%) were CHWs and 343 (40.3%)  
 217 were teachers. Out of the 852 respondents, 542 (63.6%) were female, 382 (44.8%) had received  
 218 training on deworming, 448 (52.6%) were from Nyamagabe and 404 (47.4%) from Rutsiro.  
 219 Among the 382 participants who had received training, there was a significant difference between  
 220 CHWs and teachers who had received training, with 370 (96.9%) CHWs trained compared to 12  
 221 (3.1%) teachers trained (P<0.001). There was also a significant difference in education level, with  
 222 314 (91.5%) teachers having completed secondary education, compared to only 87(17%) among  
 223 CHWs (P<0.001) (Table 1).

224 The mean age was 41.3, and the mean work experience was 10.1 years. (Table 1).

225 *Table 1. Social demographic characteristics of the study participants*

| Characteristics | Variables | N (%)       | CHWs        | Teachers    | P-value |
|-----------------|-----------|-------------|-------------|-------------|---------|
| Sample          |           | 852         | 509 (59.7%) | 343 (40.3%) | <0.001  |
| Age (year)      | 18 – 35   | 257 (30.2%) | 84 (16.5%)  | 173 (50%)   |         |
|                 | 36- 49    | 419 (49.1%) | 279 (54.8%) | 140 (40.8%) |         |
|                 | ≥50       | 176 (20.7%) | 146 (28.7%) | 30 (8.7%)   |         |
|                 | Mean (SD) | 41.3 (10.3) | 44.7 (9.1)  | 36.2 (9.9)  |         |
|                 | Range     | 20 – 70     | 24 – 70     | 20 – 65     |         |

|                                                           |                                 |             |             |             |        |
|-----------------------------------------------------------|---------------------------------|-------------|-------------|-------------|--------|
| Gender                                                    | Male                            | 310 (36.4%) | 173 (34%)   | 137 (39.9%) | 0.082  |
|                                                           | Female                          | 542 (63.6%) | 336 (66%)   | 206 (60%)   |        |
| District                                                  | Nyamagabe                       | 448 (52.6%) | 268 (52.7%) | 180 (52.5%) | 1.000  |
|                                                           | Rutsiro                         | 404 (47.4%) | 241 (47.3%) | 163 (47.5%) |        |
| Marital status                                            | Single                          | 77 (9.0%)   | 4 (0.8%)    | 73 (21.3%)  | <0.001 |
|                                                           | Married                         | 746 (87.6%) | 479 (94%)   | 267 (77.8%) |        |
|                                                           | Divorced/widowed                | 29 (3.4%)   | 26 (5.1%)   | 3 (0.9%)    |        |
| Education level                                           | Primary                         | 400 (46.9%) | 399 (78%)   | 1 (0.3%)    | <0.001 |
|                                                           | Secondary                       | 401 (47.1%) | 87 (17%)    | 314 (91.5%) |        |
|                                                           | University                      | 28 (3.3%)   | 1 (0.2%)    | 27 (7.9%)   |        |
|                                                           | Vocational/<br>Literacy classes | 23 (2.7%)   | 22(4.3%)    | 1 (0.3%)    |        |
| Years of experience                                       | ≤ 5                             | 292 (34.3%) | 171 (33.6%) | 121 (35.3%) | 0.612  |
|                                                           | ≥ 6                             | 560 (65.7%) | 338 (66.4%) | 222 (64.7%) |        |
|                                                           | Mean (SD)                       | 10.13 (7.6) | 9.61 (6.3)  | 10.9 (9.2)  | -      |
|                                                           | Range                           | 0 – 44      | 0 – 35      | 0 – 44      | -      |
| Training in<br>deworming                                  | Trained                         | 382 (44.8%) | 370 (72.7%) | 12 (3.5%)   | <0.001 |
|                                                           | Not trained                     | 470 (55.2%) | 139 (27.3%) | 331 (96.5%) |        |
| Year when they<br>received training on<br>worm infections | 2016-2018                       | 73 (19.1%)  | 68 (18.4%)  | 5 (41.7%)   | 0.058  |
|                                                           | 2019-2021                       | 309 (80.9%) | 302 (81.6%) | 7 (58.3%)   |        |

226 **Assessment of knowledge**

227 The overall mean knowledge score was 78%, with 461 (54.1%) of respondents who had a good  
 228 knowledge level (score  $\geq 80\%$ ). The mean knowledge score on STH (82.6%) was higher than on  
 229 schistosomiasis (74.5%) (table 2).

230 The three questions that most respondents answered correctly were 1) “Swimming in contaminated  
 231 water can lead to schistosomiasis” (95.1%), 2) “You can acquire STH from walking barefoot”  
 232 (94.4%), and 3) “You can transmit schistosomiasis from open defecation” (90.4%).

233 The three questions which the least respondents answered correctly were 1) “Pain during urination  
 234 is a symptom of schistosomiasis” (32.2%), 2) “The most common symptom of schistosomiasis is  
 235 fever” (58.6%) and 3) “Fever is not a common symptom of STH” (59.4%) (Table 2).

236 *Table 2. Summary of knowledge about worm infections*

237

|                                                                  | Knowledge score                |                               |                               |
|------------------------------------------------------------------|--------------------------------|-------------------------------|-------------------------------|
|                                                                  | Total                          | CHWs                          | Teachers                      |
| <b>Mean Schistosomiasis knowledge (SD)</b>                       | <b>74.5%</b><br><b>(16.62)</b> | <b>74.9%</b><br><b>(16.3)</b> | <b>73.8%</b><br><b>(17.1)</b> |
| Schistosomiasis is treatable at the health center (Yes)          | 87.3%                          | 85.3%                         | 90.4%                         |
| You can transmit schistosomiasis from open defecation (Yes)      | 90.4%                          | 89.2%                         | 92.1%                         |
| Swimming in contaminated water can lead to schistosomiasis (Yes) | 95.1%                          | 96.3%                         | 93.3%                         |

|                                                                            |                 |                     |                   |                     |
|----------------------------------------------------------------------------|-----------------|---------------------|-------------------|---------------------|
| Washing clothes in contaminated water can lead to schistosomiasis (Yes)    |                 | 84.4%               | 89.2%             | 77.3%               |
| You can get schistosomiasis from eating unripe fruits (No)                 |                 | 71.1%               | 69.2%             | 74.1%               |
| You can contract schistosomiasis through sexual intercourse (No)           |                 | 69.2%               | 65%               | 75.5%               |
| Diarrhea is a symptom of schistosomiasis (Yes)                             |                 | 82%                 | 77.6%             | 88.6%               |
| The most common symptom of schistosomiasis is fever (No)                   |                 | 58.6%               | 62.5%             | 52.8%               |
| Pain during urination is a symptom of schistosomiasis (Yes)                |                 | 32.2%               | 40.3%             | 20.1%               |
| <b>Mean STH knowledge (SD)</b>                                             |                 | <b>82.6% (14.6)</b> | <b>83.4% (15)</b> | <b>81.6% (13.9)</b> |
| You can acquire STH from walking bare foot (Yes)                           |                 | 94.4%               | 94.9%             | 93.6%               |
| If you were cured from STH, you can never get it again (No)                |                 | 72.8%               | 75.4%             | 68.8%               |
| Diarrhea is a symptom of STH (Yes)                                         |                 | 86.3%               | 85.3%             | 87.8%               |
| Fever is the most common symptom of STH (No)                               |                 | 59.4%               | 63.2%             | 55.1%               |
| STH is hereditary (No)                                                     |                 | 87.8%               | 84.9%             | 92.1%               |
| You can acquire STH through direct skin contact (No)                       |                 | 753 88.4%           | 89%               | 87.5%               |
| You can get STH from drinking and eating contaminated water and food (Yes) |                 | 89.4%               | 91.7%             | 86%                 |
| <b>Overall knowledge</b>                                                   | Mean score (SD) | 78% (12.44)         | 78.6%             | 77.2% (12.1)        |

|  |                                   |             |             |             |
|--|-----------------------------------|-------------|-------------|-------------|
|  |                                   |             | (12.6)      |             |
|  | Good knowledge ( $\geq 80\%$ )    | 461 (54.1%) | 288 (56.6%) | 173 (50.4%) |
|  | Poor to moderate knowledge (<80%) | 391 (45.9%) | 221 (43.4%) | 170 (49.6%) |

## 238 Assessment of attitudes

239 The three statements which most participants strongly agreed/ agreed with were 1) “I am  
 240 important contributor to the prevention of schistosomiasis in my community” (97.2%); 2) “I am  
 241 an important contributor to the prevention of STH in my community” (97.8%) and 3)  
 242 “Deworming is helpful in treating schistosomiasis” (96.5%). The two statements which most  
 243 participants strongly disagreed/disagreed with were 1) “STH can be best treated by traditional  
 244 healers” (98.9%) and 2) “Schistosomiasis can be best treated by traditional healers” (98.5%)  
 245 (Table 3).

246 Table 3. Summary of attitudes towards worm infections

| Attitude statements                                                      | (Strongly) agree<br>N (%) | (Strongly) disagree<br>N (%) |
|--------------------------------------------------------------------------|---------------------------|------------------------------|
| Deworming is helpful in treating schistosomiasis                         | 822 (96.5%)               | 30 (3.5%)                    |
| Deworming is helpful in treating STH                                     | 791 (92.8%)               | 61 (7.2%)                    |
| The people in my community are at high risk of acquiring schistosomiasis | 579 (68%)                 | 273 (32%)                    |
| The people in my community are at high risk of acquiring STH             | 721 (84.6%)               | 131 (15.4%)                  |
| I am an important contributor to the prevention of schistosomiasis in my | 828 (97.2%)               | 24 (2.8%)                    |



|                                                                                                  |             |             |
|--------------------------------------------------------------------------------------------------|-------------|-------------|
| community                                                                                        |             |             |
| I am an important contributor to the prevention of STH in my community                           | 833 (97.8%) | 19 (2.2%)   |
| The frequency of mass drug administration against schistosomiasis in schools/community is enough | 247 (29%)   | 605 (71%)   |
| The frequency of mass drug administration against STH in schools/community is enough             | 206 (24.2%) | 646 (75.8%) |
| Schistosomiasis can be best treated by traditional healers                                       | 13 (1.5%)   | 839 (98.5%) |
| STH can be best treated by traditional healers                                                   | 9 (1.1%)    | 843 (98.9%) |

#### 247 **Assessment of practices**

248 Most respondents reported that they often or always wash hands before eating (n=845, 99.2%) and  
 249 often or always encourage children/people to wash their hands before eating (n=844, 99.1%). The  
 250 survey also showed 298 (35%) respondents reporting that they often or always drink untreated  
 251 water, 790 (92.7%) never or rarely swim in rivers/lakes, and 771 (90.5%) never or rarely wash  
 252 clothes or utensils in open water source (Table 4).

253 *Table 4. Summary of practices related to worm infections*

| <b>Practices</b>                                 | <b>Often/always N (%)</b> | <b>Never/rarely N (%)</b> |
|--------------------------------------------------|---------------------------|---------------------------|
| I encourage children/ people to wash their hands | 844 (99.1%)               | 9 (0.9%)                  |
| I wash my hands before eating                    | 845 (99.2%)               | 7 (0.8%)                  |
| I drink untreated water                          | 298 (35%)                 | 554 (65%)                 |
| I swim in rivers/ lakes                          | 62 (7.3%)                 | 790 (92.7%)               |
| I wash clothes or utensils in open water source  | 81 (9.5%)                 | 771 (90.5%)               |

254

255 Most of respondents also reported drinking from treated water sources 822 (96.5%) - including tap  
 256 water (52.1%) and borehole (44.4%). A small percentage of respondents drank from river/lakes  
 257 (3.1%) and swamps/rocks (0.4%) (Table 5).

258 *Table 5. Sources of drinking water*

| Water sources     |             | N (%)             |           |
|-------------------|-------------|-------------------|-----------|
|                   |             | Good water source | Tap water |
|                   | Borehole    | 378 (44.4%)       |           |
| Poor water source | River/Lakes | 26 (3.1%)         | 30 (3.5%) |
|                   | Swamps/Rock | 4 (0.4%)          |           |

259 **Association of demographic characteristics and knowledge**

260 Five demographic factors (occupation, age, district, years of experience and training) in bivariate  
 261 analysis had  $P < 0.1$ . Only training in the deworming program was found to have a statistically  
 262 significant association with knowledge using multivariate analysis. Participants who were trained  
 263 were 2.04 more likely to have good knowledge on worm infections compared to those who were  
 264 not trained (95% CI: 1.39 -3.03,  $p < 0.001$ ) (Table 6).

265 *Table 6. Association of demographic characteristics and knowledge*

|            |          | Knowledge level         |                      | Bivariate<br>P-value | Multivariate           |         |
|------------|----------|-------------------------|----------------------|----------------------|------------------------|---------|
|            |          | Good<br>( $\geq 80\%$ ) | Poor<br>( $< 80\%$ ) |                      | Adjusted OR<br>(95%CI) | P-value |
| Occupation | Teachers | 173<br>(50.4%)          | 170 (49.6%)          | 0.078*               | 0.79 (0.53-<br>1.19)   | 0.263   |

|                |                   |                |             |        |                       |       |
|----------------|-------------------|----------------|-------------|--------|-----------------------|-------|
|                | CHWs              | 288<br>(56.6%) | 221(43.4%)  |        | Ref                   |       |
| Age            | 18 – 35           | 133<br>(51.8%) | 124 (48.2%) | 0.094* | 0.96 (0.59 –<br>1.16) | 0.870 |
|                | 36- 49            | 220<br>(52.5%) | 199 (47.5%) |        | 0.81 (0.56 –<br>1.18) | 0.264 |
|                | ≥50               | 108<br>(61.4%) | 68 (38.6%)  |        | Ref                   | NA    |
| Gender         | Male              | 166<br>(53.5%) | 144 (46.5%) | 0.804  |                       |       |
|                | Female            | 295<br>(54.4%) | 247 (45.6%) |        |                       |       |
| District       | Nyamagabe         | 256<br>(57.1%) | 192 (42.9%) | 0.061* | 1.15 (0.87 –<br>1.53) | 0.334 |
|                | Rutsiro           | 205<br>(50.7%) | 199 (49.3%) |        | Ref                   | NA    |
| Marital status | Single            | 42<br>(54.5%)  | 35 (45.5%)  | 0.879  |                       |       |
|                | Married           | 402<br>(53.9%) | 344 (46.1%) |        |                       |       |
|                | Divorced/ Widowed | 17<br>(58.6%)  | 12 (41.4%)  |        |                       |       |
| Education      | Primary           | 228 (57%)      | 172 (43%)   | 0.403  |                       |       |

|                                         |                                     |                |             |         |                       |       |
|-----------------------------------------|-------------------------------------|----------------|-------------|---------|-----------------------|-------|
| level                                   | Secondary                           | 205<br>(51.1%) | 196 (48.9%) |         |                       |       |
|                                         | University                          | 16<br>(57.1%)  | 12 (42.9%)  |         |                       |       |
|                                         | Vocational/Literacy<br>classes only | 12<br>(52.2%)  | 11 (47.8%)  |         |                       |       |
| Years of<br>experience                  | ≤ 5                                 | 145<br>(49.7%) | 147 (50.3%) | 0.060*  | 0.806 (0.57–<br>1.14) | 0.224 |
|                                         | ≥ 6                                 | 315<br>(56.4%) | 244 (43.6%) |         |                       |       |
| Training                                | Trained                             | 238<br>(62.3%) | 144 (37.7%) | <0.001* | 2.04 (1.39 -<br>3.03) | NA    |
|                                         | Not trained                         | 223<br>(47.4%) | 247 (52.6%) |         |                       |       |
| Years since<br>worm program<br>training | 2016-2018                           | 46 (63%)       | 27 (37%)    | 0.889   |                       |       |
|                                         | 2019-2021                           | 192<br>(62.1%) | 117 (37.9%) |         |                       |       |

266 \*P<0.1

267 \*\*P<0.05

## 268 Association of knowledge and attitudes

269 Knowledge level was found to have significant association with one attitude statement.

270 Respondents with good knowledge level were found to be 4.66 times more likely to agree with the

271 attitude statement “I am an important contributor to the prevention of schistosomiasis in my  
 272 community” than those with poor knowledge, with a  $P < 0.001$  (Table 7).

273 *Table 7. Association of knowledge and attitudes*

|                                                                                                         | <b>N Agree (%)</b> | <b>N Disagree (%)</b> | <b>Unadjusted OR</b> | <b>P-value</b> |
|---------------------------------------------------------------------------------------------------------|--------------------|-----------------------|----------------------|----------------|
| <b>Deworming is helpful in treating schistosomiasis</b>                                                 |                    |                       |                      |                |
| Good knowledge                                                                                          | 450 (97.6)         | 11 (2.4)              | 2.09 (0.98 -4.44)    | 0.051          |
| Poor knowledge                                                                                          | 372 (95.1)         | 19 (4.9)              | Ref                  |                |
| <b>The people in my community are at high risk of acquiring schistosomiasis</b>                         |                    |                       |                      |                |
| Good knowledge                                                                                          | 319 (69.2)         | 142 (30.8)            | 1.13 (0.85-1.52)     | 0.40           |
| Poor knowledge                                                                                          | 260 (66.5)         | 131 (33.5)            | ref                  |                |
| <b>I am an important contributor to the prevention of schistosomiasis in my community</b>               |                    |                       |                      |                |
| Good knowledge                                                                                          | 456 (98.9)         | 5 (1.1)               | 4.66 (1.72-12.66)    | <0.001*        |
| Poor knowledge                                                                                          | 372 (95.1)         | 19 (4.9)              | ref                  |                |
| <b>The frequency of mass drug administration against schistosomiasis in schools/community is enough</b> |                    |                       |                      |                |
| Good knowledge                                                                                          | 134 (29.1)         | 327 (70.9)            | 1.01 (0.75-1.36)     | 0.957          |
| Poor knowledge                                                                                          | 113 (28.9)         | 278 (71.1)            | ref                  |                |
| <b>Schistosomiasis can be best treated by traditional healers</b>                                       |                    |                       |                      |                |
| Good knowledge                                                                                          | 9 (2%)             | 452 (98)              | 8.94 (0.59-6.29)     | 0.402          |
| Poor knowledge                                                                                          | 4 (1%)             | 387 (99)              | ref                  |                |

|                                                                                      |             |            |                   |        |
|--------------------------------------------------------------------------------------|-------------|------------|-------------------|--------|
| Deworming is helpful in treating STH                                                 |             |            |                   |        |
| Good knowledge                                                                       | 426 (92.4)  | 35 (7.6)   | 0.87 (0.51 -1.47) | 0.595  |
| Poor knowledge                                                                       | 365 (93.4)  | 26 (6.6)   | ref               |        |
| The people in my community are at high risk of acquiring STH                         |             |            |                   |        |
| Good knowledge                                                                       | 392 (85%)   | 69 (15%)   | 1.07 (0.74-1.56)  | 0.720  |
| Poor knowledge                                                                       | 329 (84.1%) | 62 (15.9%) | ref               |        |
| I am an important contributor to the prevention of STH in my community               |             |            |                   |        |
| Good knowledge                                                                       | 452 (98)    | 9 (2%)     | 1.32 (0.53 -3.28) | 0.551  |
| Poor knowledge                                                                       | 381 (97.4)  | 10 (2.6)   | ref               |        |
| The frequency of mass drug administration against STH in schools/community is enough |             |            |                   |        |
| Good knowledge                                                                       | 109 (23.6)  | 352 (76.4) | 0.94 (0.69-1.29)  | 0.693  |
| Poor knowledge                                                                       | 97 (24.8)   | 294 (75.2) | ref               |        |
| STH can be best treated by traditional healers                                       |             |            |                   |        |
| Good knowledge                                                                       | 5 (1.1)     | 456 (98.9) | 1.06 (0.28 -3.98) | >0.999 |
| Poor knowledge                                                                       | 4 [1]       | 387 (99)   | ref               |        |

274 **Association of knowledge and practices**

275 Knowledge level was found to be significantly associated with one practice statement.

276 Respondents with good knowledge were 2.19 times more likely to “often/always” swim in

277 rivers/lakes compared to those who had poor knowledge, with P=0.006 (Table 8).

278

279

280

281 *Table 81. Association of knowledge and practices*

|                                                         | <b>Often/<br/>always<br/>n (%)</b> | <b>Never/rarely<br/>n (%)</b> | <b>Unadjusted OR</b> | <b>P-value</b> |
|---------------------------------------------------------|------------------------------------|-------------------------------|----------------------|----------------|
| <b>I encourage children/ people to wash their hands</b> |                                    |                               |                      |                |
| Good knowledge                                          | 455 (98.7%)                        | 6 (1.3%)                      | 0.39 (0.78 – 1.93)   | 0.300          |
| Poor knowledge                                          | 389 (99.5%)                        | 2 (0.5%)                      | Ref                  |                |
| <b>I wash my hands before eating</b>                    |                                    |                               |                      |                |
| Good knowledge                                          | 456 (98.9%)                        | 5 (1.1%)                      | 0.47 (0.00-2.40)     | 0.462          |
| Poor knowledge                                          | 389 (99.5%)                        | 2 (0.5%)                      | Ref                  |                |
| <b>I drink untreated water</b>                          |                                    |                               |                      |                |
| Good knowledge                                          | 173 (37.5%)                        | 288 (62.5%)                   | 1.28 (0.92-1.70)     | 0.090          |
| Poor knowledge                                          | 125 (32%)                          | 266 (68%)                     | Ref                  |                |
| <b>I swim in rivers/ lakes</b>                          |                                    |                               |                      |                |
| Good knowledge                                          | 44 (9.5%)                          | 417 (90.5%)                   | 2.19 (1.24-3.85)     | *0.006         |
| Poor knowledge                                          | 18 (4.6%)                          | 373 (95.4%)                   | Ref                  |                |
| <b>I wash clothes or utensils in open water source</b>  |                                    |                               |                      |                |
| Good knowledge                                          | 44 (9.5%)                          | (90.5%)                       | 1.01 (0.64-1.60)     | 0.968          |
| Poor knowledge                                          | 37 (9.5%)                          | 354 (90.5%)                   | ref                  |                |

283 **Qualitative results**

284 Seventeen leaders (10 from Nyamagabe and 7 from Rutsiro) were interviewed. Five key themes  
285 emerged:

286 **1. Community mobilization and sensitization by local leaders and CHWs contributed**  
287 **to the outreach of the deworming program**

288 In the national decentralized deworming program, local leaders are responsible for informing  
289 community members about the program and encouraging them to have their children dewormed.  
290 In addition, local leaders oversee and supervise the distribution of deworming tablets done by  
291 CHWs.

292 *“I work hand in hand with community health workers daily to make sure that every child*  
293 *of our Village receives the medicine that the government provided. I am present from the*  
294 *start till the end of the program. I have to make sure that all tablets are distributed, that*  
295 *they are over... yes, I have to be there.” (IDI 3)*

296 In case children are missing at the time of distribution, local leaders would conduct follow-up visits  
297 to the households to make sure that children receive their tablet.

298 *“At the sites, we checked out if parents brought children to get tablets as encouraged*  
299 *during household mobilization; and we could re-visit the ones we noticed did not come so*  
300 *that s/he brings the child the following day.” (IDI 8)*



301       **2. Community members reportedly appreciate the value of the decentralized**  
302       **deworming program and express the desire to expand it.**

303       All 17 local leaders stressed that the community members appreciate the introduction of the  
304       deworming program at village level since it makes it easier for them to access the service without  
305       travelling long distances to health centers.

306               *“They are very receptive because they do not walk miles to access the program. They are*  
307               *very receptive and happy with the program.” (IDI 1)*

308       According to the local leaders interviewed, community members are asking for adult deworming  
309       tablets so that they too can benefit from the program. In addition, the local leaders express the need  
310       to increase the frequency of MDA in order to improve child health.

311               *“My suggestion is... it is good that children get those deworming tablets. If advocacy can*  
312               *be done, adults also should be given tablets because they also have the same problem of*  
313               *worm infections. If there was the same program for adults, it could be good.” (IDI 5)*

314               *“My suggestion is that you can advocate so that the deworming tablets are available twice*  
315               *a year; that could be better. It should be twice a year and the distribution should continue*  
316               *to be done at the village level, because, when it was done at the cell level [administrative*  
317               *unit above village level and below sector level in Rwanda], it was not as effective as today*  
318               *at the village level. There was a crowd of people, and the distance was longer, and in some*  
319               *instances, all children could not be served in a single day and parents were discouraged*  
320               *as the process interfered with their daily activities. Today, they are happier to get the*  
321               *service at the village level as it is a decentralized program.” (IDI 1)*

322 Local leaders also reported that they noticed good health outcomes in children as a result of the  
323 deworming program. According to them, it prevents children from falling frequently ill and being  
324 malnourished due to worm infestations.

325 *“I mean, these tablets came on time because children had started to develop [enlarged]*  
326 *tummies, but after the deworming program, we can see the improvement. In fact, when the*  
327 *time of the program approaches, people are ready to get their children to receive*  
328 *deworming tablets.” (IDI 16)*

329 *“Yes, the impact is there because children have eliminated worms [in stool] and we*  
330 *realize a good growth development.” (IDI 16)*

331 **3. Complementary interventions to the deworming program were implemented by local**  
332 **leaders to prevent worm infections**

333 All the local leaders reported that they worked in collaboration with CHWs to conduct community  
334 sensitization sessions on hygiene as well as household visits to monitor hygiene practices.

335 *“We encourage the community to always drink boiled water because unclean water is a*  
336 *host for worms. Another thing is...to encourage our people to have latrines, not to empty*  
337 *the bowels [defecate] in the outside in an open air because the waste contains worms that*  
338 *may get into the springs and rivers when it rains, and we may contract those when we use*  
339 *that water. Another thing is to encourage the community to have hygiene habits; hygiene*  
340 *of dishes, personal body hygiene and hygiene of foodstuff because poor hygiene in this stuff*  
341 *is also source of worm infections.” (IDI 17)*

342 In view of improving household hygiene, community members, led by the local leaders, built  
343 adequate latrines for those who could not afford them.

344 *“For the households which have no latrines, we build those for them during umuganda*  
345 *[communal work in Rwanda] and the sector and district offices have a plan for that. The village*  
346 *community builds latrines, and the sector provides roofing materials.” (IDI 17)*

347 **4. Resistance and hesitance from caregivers are perceived by local leaders as**  
348 **challenges to the deworming program.**

349 Five local leaders observed that some caregivers do not adhere to the deworming program. Instead  
350 of bringing the children to the deworming sites, they would choose to go out to their farms.

351 *“When the community health workers come on time, they may also not find parents... that*  
352 *is the challenge. The parents come whenever they want, after farming activities.” (IDI 6)*

353 According to one local leader, some caregivers are resistant to deworming because they think it  
354 increases food consumption by the children, which they cannot afford.

355 *“The main reason they say is that those deworming tablets have adverse effects to their*  
356 *children. Another reason they say is that when a child has taken that tablet, s/he eats a lot*  
357 *and “I will not be able to find that food.” (IDI 10)*

358 According to some respondents, some caregivers perceive their children to be healthy, and they do  
359 not see the importance of deworming them.

360 *“There are no adverse effects, but the understanding of the community members is*  
361 *different. Some might say, “my child is healthy, s/he is not sick, so I am not taking him/her*  
362 *anyway.” (IDI 11)*

363 **5. Poor water access is identified by local leaders as a drawback in the prevention of**  
364 **worm infections.**

365 Twelve local leaders mentioned that their communities had poor access to safe water because of  
366 geographical and financial barriers, since they had to move long distances to access water sources  
367 and pay for the water.

368 *“About water...it is not yet fine, it is not yet good because, for instance in our village there*  
369 *is no drinking water, people still have to take jerry cans and go to fetch water; what we do*  
370 *is to encourage them to boil water so that it is safe to drink.” (IDI 5)*

371 *“Yes, it happens! It happens, the problem of low financial capacity exists, because when*  
372 *you tell a parent to give healthy food to their children or to adopt hygiene, it requires them*  
373 *to have money to buy soap or water, because in our village there is water available but to*  
374 *access it people have to pay for it. This problem of low financial means then arises.” (IDI,*  
375 *8)*

376 Overall, the qualitative analysis led to the identification of key challenges based on the experiences  
377 and perspectives of local leaders, as well as their perspectives of the needs of the community.

379 **DISCUSSION**

380 CHWs, teachers and local leaders are key implementers of the national deworming program. The  
381 results of this study showed the knowledge of CHWs and teachers on worm infections could be  
382 improved. The community expressed the desire to increase the frequency of the deworming  
383 program and include adult members in the program.

384 Our results supported that training could improve the knowledge about deworming. Respondents  
385 who had received training had a higher knowledge on worm infections compared to those who had  
386 not. It is important to continue and scale up training efforts, especially when more than half of our  
387 participants (55.2%) had not received any prior training; particularly for teachers, as only 3.5% of  
388 them reported having received prior training. In 2018, about 42,000 CHWs were trained on  
389 common neglected tropical diseases, according to the Rwandan Biomedical Center [\[12\]](#). Such  
390 training efforts should be expanded to teachers.

391 Regardless of training participation, the overall knowledge related to worm infections among  
392 teachers and CHWs was not good, with only 54% of the respondents having a good knowledge  
393 level. A previous study conducted in Ivory Coast had similar results, where respondents had low  
394 knowledge about worm infections [\[25\]](#). Knowledge about symptoms and treatment of worm  
395 infections were the lowest. Previous studies in Nigeria and Yemen also found that even if people  
396 had heard about schistosomiasis, their knowledge of symptoms was generally low [\[26, 27\]](#). Our  
397 findings support the need to strengthen deworming education for program implementers, with an  
398 emphasis on signs and symptoms of worm infections. The program curriculum should be reviewed  
399 and revised to ensure such knowledge gap is addressed. Improving this area of knowledge could  
400 potentially improve the ability of CHWs and teachers in early identification of infections in the  
401 community, which in turn could reduce the transmissibility within the community.

402 Our respondents generally held positive attitude towards the deworming program. CHWs and  
403 teachers were receptive to the program and believed it was helpful in preventing worm infections.  
404 The CHWs took on the responsibilities in the distribution of deworming tablets. They widely  
405 agreed they were important contributors in the prevention of worm infections, and the deworming  
406 was important. On this continent, the use of traditional medicine is widely accepted in many  
407 countries [25]. However, most of our study respondents did not believe traditional healers could  
408 effectively treat worm infections. The receptive attitudes showed the success of the program in  
409 enhancing buy-in from stakeholders.

410 Overall, our study shows that the deworming program was appreciated by the local community  
411 leaders. Local leaders could identify the benefits of the decentralization of the MDA program,  
412 contributing to the ease of access to the tablets, and the numerous positive health outcomes. Similar  
413 appreciation of the decentralization of health services were seen in similar countries such as Kenya  
414 [30]. However, local leaders expressed a need to increase the frequency of MDA. Currently the  
415 WHO recommends frequency for MDA to be twice a year [29]. However, respondents perceived  
416 that some communities only had MDA once a year. Additionally, they expressed the need for adult  
417 deworming, as worm infections also affect adults. Studies have shown that adult who were  
418 engaged in farming activities could have higher risk than children of getting hookworm infections  
419 [30]. Policy makers should consider expanding the scope of the deworming program to include  
420 adults.

421 Local leaders reported that some misconceptions and resistance from the community members  
422 pose a challenge to the implementation of the deworming program. One of the misconceptions is  
423 that their children are healthy and do not need medication. Resistance to deworming is also found  
424 in other countries like Kenya, where misconceptions about the tablets was found to cause

425 reluctance [28]. Additionally, according to local leaders, one of the reasons why community  
426 members exhibit resistance to the deworming program is their inability to provide enough food to  
427 their children, as they believe that deworming contributes to increasing children's appetite. This  
428 was highlighted in a similar study conducted in Kenya where food insecurity posed a major  
429 challenge to MDA compliance [28]. Misconceptions and resistance may become bottlenecks to  
430 the deworming program as they may hinder timely control and elimination of worm infections.  
431 Therefore, there is a need to strengthen community sensitization programs, with an emphasis on  
432 these misconceptions and on the impact of deworming on child health.

433 The study results showed that most of the respondents consumed water from taps and boreholes.  
434 However, due to geographical and financial limitations to water access, many people had to walk  
435 long distances to reach these water sources, and some were required to pay to access water in  
436 certain areas. Lack of access to safe water could increase the prevalence as well as the intensity of  
437 infection and re-infection [31]. Regardless, similar to many other neighboring countries, a  
438 significant portion of our respondents (35%) reported drinking untreated water [32]. Literature has  
439 suggested that effective deworming program must be complemented with water, sanitation and  
440 hygiene (WASH) interventions [33, 34].

441 One unexpected finding in our study was that respondents with good knowledge on worm  
442 infections were more likely to swim in rivers/lakes. A study in Tanzania found people still had a  
443 tendency to visit the lakes/rivers for recreational purposes despite knowing the risk of infection  
444 from water bodies [35]. Studies have shown human decisions do not strictly follow norms, rules  
445 and regulations, but are influenced by a mixture of emotions, source of satisfaction and other  
446 psycho-social factors [36,37]. Further research to understand the decision process leading to the  
447 behavior is needed.

448 This study had some limitations which should be considered when interpreting its findings:

449 Firstly, the practice score in this survey relied on self-reporting. This could have subjected the  
450 findings to desirability bias, especially when practices were not directly observed. Secondly, this  
451 study only interviewed local leaders. Future study to collect community members' perspectives  
452 and experiences towards the deworming program may generate further insights to complement our  
453 findings.



454 **Acknowledgements**

455 A special thanks goes to Dr. Rex Wong, Dr. Zahirah McNatt, and the entire faculty of the institute  
456 for Global Health Equity education at the University of Global Health Equity, for their support in  
457 the development of this research.

458 We also thank Jessica Bourdaire, Grace Kelly Muvunyi, Georgette Munezero and Vera Kwera  
459 from the World Food Programme for their insightful feedback in the development of this  
460 manuscript.

461 **REFERENCES**

- 462 (1) Maddren R, Phillips A, Ower A, Landeryou T, Mengistu B, Anjulo U, et al. Soil-  
463 transmitted helminths and schistosome infections in Ethiopia: a systematic review of  
464 progress in their control over the past 20 years. *Parasit Vectors*. 2021 Feb 5;14[1]:97.
- 465 (2) WHO. Soil-transmitted helminth infections. [Internet]. [cited 2022 May 22]. Available  
466 from: [https://www.who.int/news-room/fact-sheets/detail/soil-transmitted-helminth-](https://www.who.int/news-room/fact-sheets/detail/soil-transmitted-helminth-infections)  
467 [infections](https://www.who.int/news-room/fact-sheets/detail/soil-transmitted-helminth-infections)
- 468 (3) Osakunor DNM, Woolhouse MEJ, Mutapi F. Paediatric schistosomiasis: What we know  
469 and what we need to know. *PLOS Neglected Tropical Diseases*. 2018 Feb  
470 8;12[2]:e0006144.
- 471 (4) WHO - Soil-transmitted helminth infections [Internet]. [cited 2021 Nov 23]. Available  
472 from: [https://www.who.int/news-room/fact-sheets/detail/soil-transmitted-helminth-](https://www.who.int/news-room/fact-sheets/detail/soil-transmitted-helminth-infections)  
473 [infections](https://www.who.int/news-room/fact-sheets/detail/soil-transmitted-helminth-infections)
- 474 (5) CDC - Soil-transmitted Helminths [Internet]. [cited 2021 Nov 23]. Available from:  
475 <https://www.cdc.gov/parasites/sth/index.html>
- 476 (6) WHO - Schistosomiasis – Disease [Internet]. [cited 2021 Nov 23]. Available from:  
477 <https://www.who.int/news-room/fact-sheets/detail/schistosomiasis>
- 478 (7) King CH. Parasites and poverty: The case of schistosomiasis. *Acta Tropica*. 2010 Feb  
479 1;113[2]:95–104.
- 480 (8) CDC - Schistosomiasis - Disease [Internet]. 2019 [cited 2021 Nov 23]. Available from:  
481 <https://www.cdc.gov/parasites/schistosomiasis/disease.html>
- 482 (9) Crompton DWT, Nesheim MC. Nutritional impact of intestinal helminthiasis during the  
483 human life cycle. *Annu Rev Nutr*. 2002 Jul 1;22[1]:35–59.

- 484 (10) Pabalan N, Singian E, Tabangay L, Jarjanazi H, Boivin MJ, Ezeamama AE. Soil-  
485 transmitted helminth infection, loss of education and cognitive impairment in school-  
486 aged children: A systematic review and meta-analysis. *PLoS Negl Trop Dis*. 2018  
487 Jan;12[1]:e0005523.
- 488 (11) King CH. SCHISTOSOMIASIS: CHALLENGES AND OPPORTUNITIES  
489 [Internet]. *The Causes and Impacts of Neglected Tropical and Zoonotic Diseases:  
490 Opportunities for Integrated Intervention Strategies*. National Academies Press (US);  
491 2011 [cited 2021 Nov 23]. Available from:  
492 <https://www.ncbi.nlm.nih.gov/books/NBK62510/>
- 493 (12) RBC. *Rwanda NTD strategic Plan 2019-2024*. [Internet]. [cited 2021 Nov 23]  
494 2019 Available from  
495 [https://rbc.gov.rw/fileadmin/user\\_upload/guide2019/guide2019/RWANDA%20NTD%20](https://rbc.gov.rw/fileadmin/user_upload/guide2019/guide2019/RWANDA%20NTD%20STRATEGIC%20PLAN%202019-2024.pdf)  
496 [STRATEGIC%20PLAN%202019-2024.pdf](https://rbc.gov.rw/fileadmin/user_upload/guide2019/guide2019/RWANDA%20NTD%20STRATEGIC%20PLAN%202019-2024.pdf)
- 497 (13) NISR, Republic of Rwanda. *Agricultural Household Survey*. [Internet]. [cited  
498 Jan 13]. Available from [https://www.statistics.gov.rw/datasource/agricultural-](https://www.statistics.gov.rw/datasource/agricultural-household-survey-2020)  
499 [household-survey-2020](https://www.statistics.gov.rw/datasource/agricultural-household-survey-2020)
- 500 (14) MOH. *Annual Report July 2009-2010*. [Internet]. [cited 2021 Nov 23] 2010  
501 Available from  
502 [https://extranet.who.int/countryplanningcycles/sites/default/files/planning\\_cycle\\_reposito](https://extranet.who.int/countryplanningcycles/sites/default/files/planning_cycle_repository/rwanda/final-moh-annual-report-july-2009-june-2010.pdf)  
503 [ry/rwanda/final-moh-annual-report-july-2009-june-2010.pdf](https://extranet.who.int/countryplanningcycles/sites/default/files/planning_cycle_repository/rwanda/final-moh-annual-report-july-2009-june-2010.pdf)
- 504 (15) Kabatende J, Mugisha M, Ntirenganya L, Barry A, Ruberanziza E, Mbonigaba  
505 JB, et al. Prevalence, Intensity, and Correlates of Soil-Transmitted Helminth Infections

- 506 among School Children after a Decade of Preventive Chemotherapy in Western  
507 Rwanda. *Pathogens*. 2020 Dec;9[12]:1076.
- 508 (16) WFP- Home-Grown School Feeding in Rwanda. [Internet]. 2019. Available  
509 from <https://docs.wfp.org/api/documents/WFP-0000106253/download/>
- 510 (17) Melo E Lima TR de, Maia PFC de MD, Valente EP, Vezzini F, Tamburlini G.  
511 Effectiveness of an action-oriented educational intervention in ensuring long term  
512 improvement of knowledge, attitudes and practices of community health workers in  
513 maternal and infant health: a randomized controlled study. *BMC Med Educ*. 2018 Sep  
514 27;18[1]:224.
- 515 (18) Nyamagabe District. [Internet]. [cited 2021 Nov 24]. Available from:  
516 <https://www.nyamagabe.gov.rw/>.
- 517 (19) Mineduc. Nyamagabe District Environmental and Social Management Plan  
518 (ESMP). 2019 December Available from  
519 [https://www.mineduc.gov.rw/fileadmin/user\\_upload/Mineduc/SPIU\\_Documents/ESMP/nyamagabe/NYAMAGABE\\_DISTRICT-  
520 ESMP\\_FOR\\_CONSTRUCTION\\_OF\\_CLASSROOMS\\_AND\\_LATRINES\\_SUB-  
521 PROJECTS\\_UNDER\\_RWANDA\\_QBE-HCD\\_PROJECT.pdf](https://www.mineduc.gov.rw/fileadmin/user_upload/Mineduc/SPIU_Documents/ESMP/nyamagabe/NYAMAGABE_DISTRICT-ESMP_FOR_CONSTRUCTION_OF_CLASSROOMS_AND_LATRINES_SUB-PROJECTS_UNDER_RWANDA_QBE-HCD_PROJECT.pdf)
- 522
- 523 (20) *Rutsiro District*. [Internet]. [cited 2021 Nov 24]. Available from:  
524 <https://www.rutsiro.gov.rw/>.
- 525 (21) Mineduc. Rutsiro District Environmental and Social Management Plan (ESMP).  
526 2019 December Available from  
527 [https://www.mineduc.gov.rw/fileadmin/user\\_upload/Mineduc/SPIU\\_Documents/ESMP/rutsi  
528 ro/RUTSIRO\\_DISTRICT-](https://www.mineduc.gov.rw/fileadmin/user_upload/Mineduc/SPIU_Documents/ESMP/rutsiro/RUTSIRO_DISTRICT-)

529 ESMP FOR CONSTRUCTION OF CLASSROOMS AND LATRINES SUB-  
530 PROJECTS UNDER RWANDA QBE-HCD PROJECT.pdf

- 531 (22) Hajian-Tilaki K. Sample size estimation in epidemiologic studies. *Caspian J*  
532 *Intern Med.* 2011;2(4):289–98.
- 533 (23) Inobaya MT, Chau TN, Ng S-K, MacDougall C, Olveda RM, Tallo VL, et al.  
534 Mass drug administration and the sustainable control of schistosomiasis: Community  
535 health workers are vital for global elimination efforts. *International Journal of Infectious*  
536 *Diseases.* 2018 Jan 1;66:14–21.
- 537 (24) Bloom, B. S. *Taxonomy of educational objectives, handbook I: The cognitive*  
538 *domain.* 1956. New York: David McKay Co Inc.
- 539 (25) Acka CA, Raso G, N’Goran EK, Tschannen AB, Bogoch II, Séraphin E, et al.  
540 *Parasitic Worms: Knowledge, Attitudes, and Practices in Western Côte d’Ivoire with*  
541 *Implications for Integrated Control.* *PLOS Neglected Tropical Diseases.* 2010 Dec  
542 21;4[12]:e910.
- 543 (26) Dawaki S, Al-Mekhlafi HM, Ithoi I, Ibrahim J, Abdulsalam AM, Ahmed A, et  
544 al. *The Menace of Schistosomiasis in Nigeria: Knowledge, Attitude, and Practices*  
545 *Regarding Schistosomiasis among Rural Communities in Kano State.* *PLOS ONE.* 2015  
546 Nov 25;10[11]:e0143667.
- 547 (27) Sady H, Al-Mekhlafi HM, Atroosh WM, Al-Delaimy AK, Nasr NA, Dawaki S,  
548 et al. *Knowledge, attitude, and practices towards schistosomiasis among rural population*  
549 *in Yemen.* *Parasites & Vectors.* 2015 Aug 25;8[1]:436.
- 550 (28) Omedo MO, Matey EJ, Awiti A, Ogutu M, Alaii J, Karanja DMS, et al.  
551 *Community Health Workers’ Experiences and Perspectives on Mass Drug*

- 552 Administration for Schistosomiasis Control in Western Kenya: The SCORE Project. The  
553 American Journal of Tropical Medicine and Hygiene. 2012 Dec 5;87[6]:1065–72.
- 554 (29) WHO. *Eliminating Soil-Transmitted Helminthiasis as a Public Health Problem in*  
555 *Children*. [Internet]. [cited 2021 Nov 23] Available from  
556 [https://apps.who.int/iris/bitstream/handle/10665/44804/9789241503129\\_eng.pdf?sequenc](https://apps.who.int/iris/bitstream/handle/10665/44804/9789241503129_eng.pdf?sequence=1&isAllowed=y)  
557 [e=1&isAllowed=y](https://apps.who.int/iris/bitstream/handle/10665/44804/9789241503129_eng.pdf?sequence=1&isAllowed=y)
- 558 (30) Magalhães RJS, Salamat MS, Leonardo L, Gray DJ, Carabin H, Halton K, et al.  
559 Mapping the Risk of Soil-Transmitted Helminthic Infections in the Philippines. PLOS  
560 Neglected Tropical Diseases. 2015 Sep 14;9[9]:e0003915.
- 561 (31) Njomo DW, Masaku J, Mwendu F, Odhiambo G, Musuva R, Matey E, et al.  
562 Local stakeholders’ perspectives of community sensitization for school-based  
563 deworming programme in Kenya. Tropical Diseases, Travel Medicine and Vaccines.  
564 2017 Aug 22;3[1]:15.
- 565 (32) Nasr NA, Al-Mekhlafi HM, Ahmed A, Roslan MA, Bulgiba A. Towards an  
566 effective control programme of soil-transmitted helminth infections among Orang Asli  
567 in rural Malaysia. Part 2: Knowledge, attitude, and practices. Parasites & Vectors. 2013  
568 Jan 28;6[1]:28.
- 569 (33) Campbell SJ, Nery SV, Wardell R, D’Este CA, Gray DJ, McCarthy JS, et al.  
570 Water, Sanitation and Hygiene (WASH) and environmental risk factors for soil-  
571 transmitted helminth intensity of infection in Timor-Leste, using real time PCR. PLOS  
572 Neglected Tropical Diseases. 2017 Mar 27;11[3]:e0005393.
- 573 (34) Sacolo-Gwebu H, Kabuyaya M, Chimbari M. Knowledge, attitudes and practices  
574 on schistosomiasis and soil-transmitted helminths among caregivers in Ingwavuma area

- 575 in uMkhanyakude district, South Africa. BMC Infectious Diseases. 2019 Aug  
576 22;19[1]:734.
- 577 (35) Munisi DZ, Buza J, Mpolya EA, Angelo T, Kinung'hi SM. Knowledge, attitude,  
578 and practices on intestinal schistosomiasis among primary schoolchildren in the Lake  
579 Victoria basin, Rorya District, north-western Tanzania. BMC Public Health. 2017 Sep  
580 21;17[1]:731.
- 581 (36) Kusev P, Purser H, Heilman R, Cooke AJ, Van Schaik P, Baranova V, Martin R,  
582 Ayton P. Understanding risky behavior: the influence of cognitive, emotional and  
583 hormonal factors on decision-making under risk. Frontiers in psychology. 2017 Feb  
584 1;8:102.
- 585 (37) Tennyson S, Yang HK. The role of life experience in long-term care insurance  
586 decisions. Journal of Economic Psychology. 2014 Jun 1;42:175-88.

587 **Appendices**

588 **S1 Appendix: Quantitative data collection tool**

589 **Demographics:**

|                                                      |                                                   |                                                |                                    |                                                                                           |
|------------------------------------------------------|---------------------------------------------------|------------------------------------------------|------------------------------------|-------------------------------------------------------------------------------------------|
| <b>Age:</b>                                          |                                                   |                                                |                                    |                                                                                           |
| <b>Sex:</b>                                          | <input type="checkbox"/> Male                     | <input type="checkbox"/> Female                |                                    |                                                                                           |
| <b>Address:</b>                                      | <b>District:</b>                                  | <b>Sector:</b>                                 | <b>Cell:</b>                       | <b>Village:</b>                                                                           |
| <b>Profession/Occupation:</b>                        | <input type="checkbox"/> CHW                      | <input type="checkbox"/> Teacher               |                                    |                                                                                           |
| <b>Highest level of education attained:</b>          | <input type="checkbox"/> None                     | <input type="checkbox"/> Primary               | <input type="checkbox"/> Secondary | <input type="checkbox"/> University                                                       |
|                                                      | <input type="checkbox"/> Vocational training only | <input type="checkbox"/> Literacy classes only |                                    |                                                                                           |
| <b>Marital status:</b>                               | <input type="checkbox"/> Single                   | <input type="checkbox"/> Married               | <input type="checkbox"/> Divorced  | <input type="checkbox"/> Widowed                                                          |
| <b>Years of experience as a teacher/CHW:</b>         |                                                   |                                                |                                    |                                                                                           |
| <b>Were you trained on deworming?</b>                | <input type="checkbox"/> Yes                      | <input type="checkbox"/> No                    |                                    |                                                                                           |
| <b>Year when you were last trained on deworming:</b> | <input type="checkbox"/> 2016                     | <input type="checkbox"/> 2017                  | <input type="checkbox"/> 2018      | <input type="checkbox"/> 2019 <input type="checkbox"/> 2020 <input type="checkbox"/> 2021 |

590

591



592 **KAP for CHWs and teachers**

593 **Knowledge**

| <b>Section 1. Schistosomiasis</b>                                   | <b>Yes</b>               | <b>No</b>                | <b>I don't know</b>      |
|---------------------------------------------------------------------|--------------------------|--------------------------|--------------------------|
| • Schistosomiasis is treatable at the health center                 | <input type="checkbox"/> | <input type="checkbox"/> | <input type="checkbox"/> |
| • You can transmit schistosomiasis from open defecation             | <input type="checkbox"/> | <input type="checkbox"/> | <input type="checkbox"/> |
| • Swimming in contaminated water can lead to schistosomiasis        | <input type="checkbox"/> | <input type="checkbox"/> | <input type="checkbox"/> |
| • Washing clothes in contaminated water can lead to schistosomiasis | <input type="checkbox"/> | <input type="checkbox"/> | <input type="checkbox"/> |
| • You can get schistosomiasis from eating unripe fruits             | <input type="checkbox"/> | <input type="checkbox"/> | <input type="checkbox"/> |
| • You can contract schistosomiasis through sexual intercourse       | <input type="checkbox"/> | <input type="checkbox"/> | <input type="checkbox"/> |
| • Diarrhea is a symptom of schistosomiasis                          | <input type="checkbox"/> | <input type="checkbox"/> | <input type="checkbox"/> |
| • The most common symptom of schistosomiasis is fever               | <input type="checkbox"/> | <input type="checkbox"/> | <input type="checkbox"/> |
| • Pain during urination is a symptom of schistosomiasis             | <input type="checkbox"/> | <input type="checkbox"/> | <input type="checkbox"/> |
| <b>Section 2: Soils Transmitted Helminths (STH)</b>                 | <b>Yes</b>               | <b>No</b>                | <b>I don't know</b>      |
| • You can acquire STH from walking bare foot                        | <input type="checkbox"/> | <input type="checkbox"/> | <input type="checkbox"/> |

|                                                                                                                        |                                                                            |
|------------------------------------------------------------------------------------------------------------------------|----------------------------------------------------------------------------|
| <ul style="list-style-type: none"> <li>If you were cured from STH, you can never get it again.</li> </ul>              | <input type="checkbox"/> <input type="checkbox"/> <input type="checkbox"/> |
| <ul style="list-style-type: none"> <li>Diarrhea is a symptom of STH</li> </ul>                                         | <input type="checkbox"/> <input type="checkbox"/> <input type="checkbox"/> |
| <ul style="list-style-type: none"> <li>Fever is the most common symptom of STH</li> </ul>                              | <input type="checkbox"/> <input type="checkbox"/> <input type="checkbox"/> |
| <ul style="list-style-type: none"> <li>STH is hereditary</li> </ul>                                                    | <input type="checkbox"/> <input type="checkbox"/> <input type="checkbox"/> |
| <ul style="list-style-type: none"> <li>You can acquire STH through direct skin contact</li> </ul>                      | <input type="checkbox"/> <input type="checkbox"/> <input type="checkbox"/> |
| <ul style="list-style-type: none"> <li>You can get STH from drinking and eating contaminated water and food</li> </ul> | <input type="checkbox"/> <input type="checkbox"/> <input type="checkbox"/> |

594 **Attitudes**

| <b>Section 1: Schistosomiasis</b>                                                                                                    | <b>Strongly agree</b>    | <b>Agree</b>             | <b>Disagree</b>          | <b>Strongly disagree</b> |
|--------------------------------------------------------------------------------------------------------------------------------------|--------------------------|--------------------------|--------------------------|--------------------------|
| <ul style="list-style-type: none"> <li>Deworming is helpful in treating schistosomiasis</li> </ul>                                   | <input type="checkbox"/> | <input type="checkbox"/> | <input type="checkbox"/> | <input type="checkbox"/> |
| <ul style="list-style-type: none"> <li>The people in my community are at high risk of acquiring schistosomiasis</li> </ul>           | <input type="checkbox"/> | <input type="checkbox"/> | <input type="checkbox"/> | <input type="checkbox"/> |
| <ul style="list-style-type: none"> <li>I am an important contributor to the prevention of schistosomiasis in my community</li> </ul> | <input type="checkbox"/> | <input type="checkbox"/> | <input type="checkbox"/> | <input type="checkbox"/> |

|                                                                                                                                                    |                                                                                                     |
|----------------------------------------------------------------------------------------------------------------------------------------------------|-----------------------------------------------------------------------------------------------------|
| <ul style="list-style-type: none"> <li>The frequency of mass drug administration against schistosomiasis in schools/community is enough</li> </ul> | <input type="checkbox"/> <input type="checkbox"/> <input type="checkbox"/> <input type="checkbox"/> |
| <ul style="list-style-type: none"> <li>Schistosomiasis can be best treated by traditional healers</li> </ul>                                       | <input type="checkbox"/> <input type="checkbox"/> <input type="checkbox"/> <input type="checkbox"/> |
| <b>Section 2: STH</b>                                                                                                                              | <b>Strongly agree</b> <b>Agree</b> <b>Disagree</b> <b>Strongly disagree</b>                         |
| <ul style="list-style-type: none"> <li>Deworming is helpful in treating STH</li> </ul>                                                             | <input type="checkbox"/> <input type="checkbox"/> <input type="checkbox"/> <input type="checkbox"/> |
| <ul style="list-style-type: none"> <li>The people in my community are at high risk of acquiring STH</li> </ul>                                     | <input type="checkbox"/> <input type="checkbox"/> <input type="checkbox"/> <input type="checkbox"/> |
| <ul style="list-style-type: none"> <li>I am an important contributor to the prevention of STH in my community</li> </ul>                           | <input type="checkbox"/> <input type="checkbox"/> <input type="checkbox"/> <input type="checkbox"/> |
| <ul style="list-style-type: none"> <li>The frequency of mass drug administration against STH in schools/community is enough</li> </ul>             | <input type="checkbox"/> <input type="checkbox"/> <input type="checkbox"/> <input type="checkbox"/> |
| <ul style="list-style-type: none"> <li>STH can be best treated by traditional healers</li> </ul>                                                   | <input type="checkbox"/> <input type="checkbox"/> <input type="checkbox"/> <input type="checkbox"/> |

595 **Practices**

|  |              |               |              |               |
|--|--------------|---------------|--------------|---------------|
|  | <b>Never</b> | <b>Rarely</b> | <b>Often</b> | <b>Always</b> |
|--|--------------|---------------|--------------|---------------|

|                                                                                                        |                                                                                                                                                                           |
|--------------------------------------------------------------------------------------------------------|---------------------------------------------------------------------------------------------------------------------------------------------------------------------------|
| <ul style="list-style-type: none"> <li>I encourage children/ people to wash their hands</li> </ul>     | <input type="checkbox"/> <input type="checkbox"/> <input type="checkbox"/> <input type="checkbox"/>                                                                       |
| <ul style="list-style-type: none"> <li>I wash my hands before eating</li> </ul>                        | <input type="checkbox"/> <input type="checkbox"/> <input type="checkbox"/> <input type="checkbox"/>                                                                       |
| <ul style="list-style-type: none"> <li>I drink untreated water</li> </ul>                              | <input type="checkbox"/> <input type="checkbox"/> <input type="checkbox"/> <input type="checkbox"/>                                                                       |
| <ul style="list-style-type: none"> <li>I swim in rivers/ lakes</li> </ul>                              | <input type="checkbox"/> <input type="checkbox"/> <input type="checkbox"/> <input type="checkbox"/>                                                                       |
| <ul style="list-style-type: none"> <li>I wash clothes or utensils in open water source</li> </ul>      | <input type="checkbox"/> <input type="checkbox"/> <input type="checkbox"/> <input type="checkbox"/>                                                                       |
| <ul style="list-style-type: none"> <li>What is the common source of drinking water you use?</li> </ul> | <input type="checkbox"/> River/Lakes<br><input type="checkbox"/> Tap water<br><input type="checkbox"/> Boreholes<br><input type="checkbox"/> Others, please specify _____ |

596 **S2 Appendix: Qualitative data collection tool**

597 **Local leaders’ qualitative interview questions**

598 1. As a village leader, can you describe your experience working in the  
 599 decentralized deworming program?

600 2. As village leader, what challenges, if any, have you faced while working in the  
 601 decentralized deworming program?

- 602           3. What reactions have you observed or received from your community on the  
603           decentralized deworming program?
- 604           4. What interventions, apart from deworming, have you implemented or tried to  
605           implement in your community to address/combat intestinal worms?
- 606           5. What recommendations do you have on how the decentralized deworming  
607           program can be improved?
- 608           6. Is there anything else you would like to share with us regarding this program  
609           that might not have been discussed during this interview?
